# Supplementary material
Source: PubMed Central journal article supplement (PMC4955398)

## Supplementary Figure S3: The degrees of freedom of the S3-S4 complex along several simulated trajectories during activation

**Figure S3:** The rigid body motion of the S3-S4 complex was simulated 110 times. The stochastic force causes the motion trajectories to be significantly different between runs. The 6 degrees of freedom along five randomly selected trajectories (rows I to V) are shown. The red curve is the fraction of open S6 conformations along the trajectory.

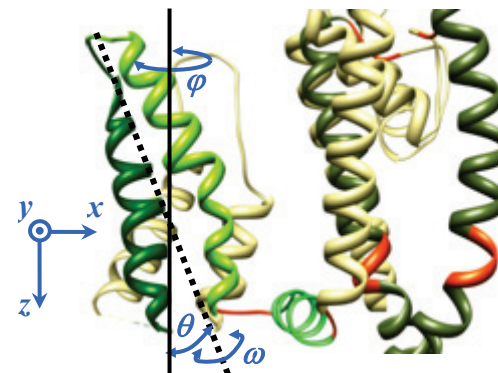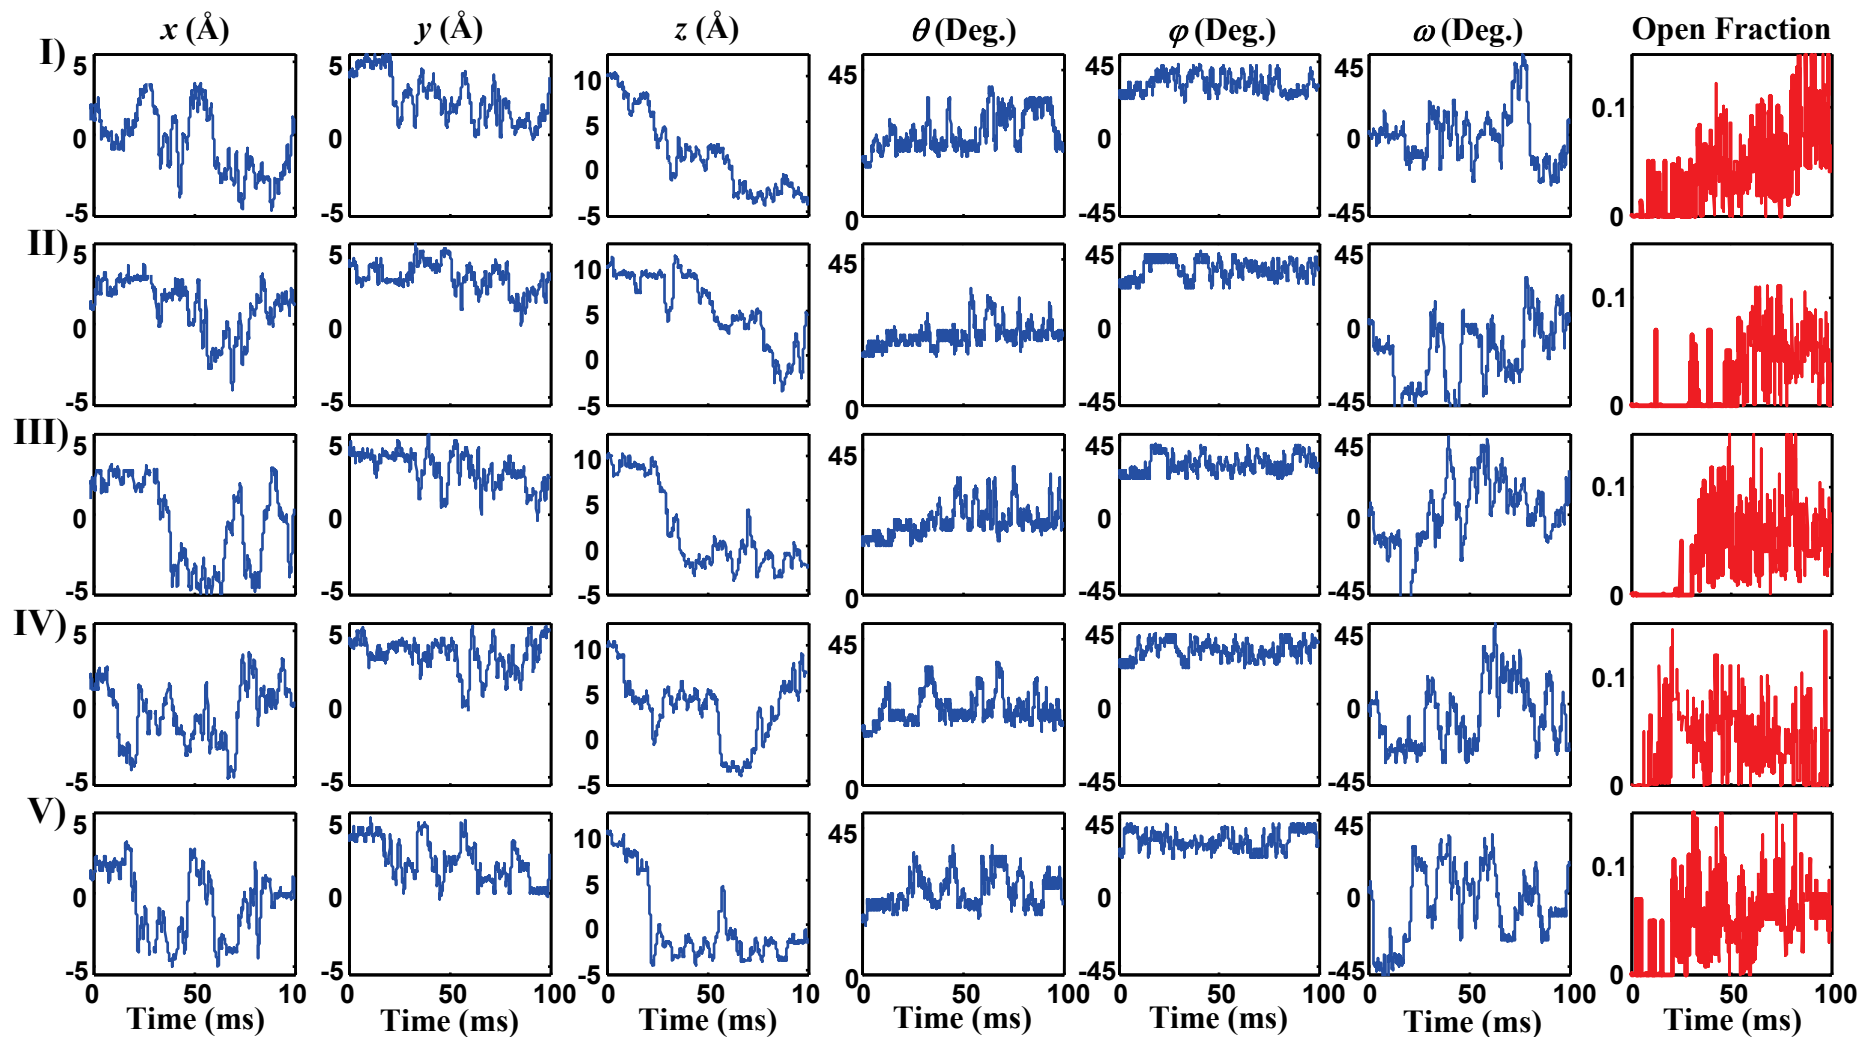

Supplement: NIHMS750443-supplement-3.pdf [file NIHMS750443-supplement-3.pdf]
